# Supplementary material for: Thermostable Human Basic Fibroblast Growth Factor (TS-bFGF) Engineered with a Disulfide Bond Demonstrates Superior Culture Outcomes in Human Pluripotent Stem Cell
Source: MDPI journal article supplement (doi:10.3390/biology12060888), 2023-06-20
Supplement: s1 [file s1]

Supplementary Figure S1

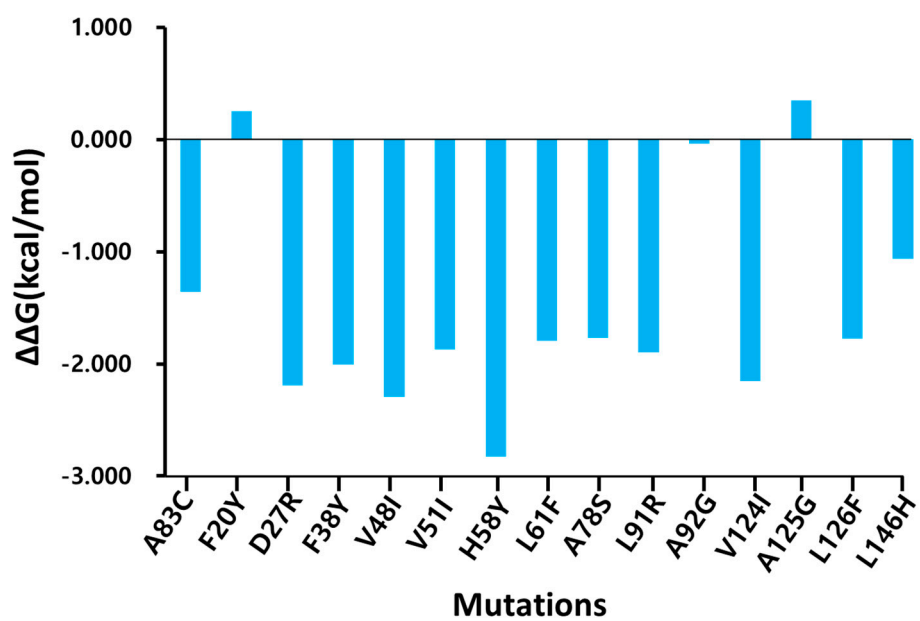

Supplementary Figure S1. 15 selected mutation sites and the corresponding  $\Delta\Delta G$  values calculated using FoldX.
